# Supplementary material for: Efficacy of a low-FODMAP diet in adult irritable bowel syndrome: a systematic review and meta-analysis
Source: PubMed Central journal article supplement (PMC8354978; doi:10.1007/s00394-020-02473-0), 2021-02-14
Supplement: 394_2020_2473_MOESM1_ESM.pdf [file 394_2020_2473_MOESM1_ESM.pdf]

Supplementary data

## **The efficacy of a low-FODMAP diet in adult irritable bowel syndrome: a systematic review and meta-analysis**

Anne-Sophie van Lanen<sup>1,2</sup>, Angelika de Bree<sup>2</sup>, Arno Greyling<sup>2,3</sup>

<sup>1</sup> Wageningen University & Research, Division of Human Nutrition and Health, Wageningen, The Netherlands

<sup>2</sup> Unilever, Unilever Foods Innovation Centre, Wageningen, The Netherlands

**Address correspondence to:** Anne-Sophie van Lanen, [anne-sophie.vanlanen@wur.nl](mailto:anne-sophie.vanlanen@wur.nl)

## Supplementary materials

**Table S1** Sensitivity analysis for the primary analysis

| Study out             | Standardized mean difference | P value | LL    | UL    | I <sup>2</sup> |
|-----------------------|------------------------------|---------|-------|-------|----------------|
| Bohn (2015)           | -0.71                        | 0.001   | -0.90 | -0.52 | 32%            |
| Eswaran (2016)        | -0.68                        | 0.001   | -0.92 | -0.43 | 58%            |
| Halmos (2014)         | -0.67                        | 0.001   | -0.91 | -0.43 | 58%            |
| Harvie (2017)         | -0.63                        | 0.001   | -0.86 | -0.40 | 56%            |
| McIntosh (2017)       | -0.64                        | 0.001   | -0.88 | -0.41 | 57%            |
| Ong (2010)            | -0.60                        | 0.001   | -0.81 | -0.40 | 46%            |
| Paduano (2019)        | -0.70                        | 0.001   | -0.93 | -0.48 | 50%            |
| Patcharatrakul (2019) | -0.65                        | 0.001   | -0.89 | -0.41 | 58%            |
| Pedersen (2014)       | -0.63                        | 0.001   | -0.87 | -0.40 | 56%            |
| Staudacher (2012)     | -0.62                        | 0.001   | -0.85 | -0.40 | 54%            |
| Staudacher (2017)     | -0.67                        | 0.001   | -0.92 | -0.43 | 58%            |
| Zahedi (2018)         | -0.66                        | 0.001   | -0.90 | -0.41 | 58%            |

Abbreviations: LL, lower limit of 95% confidence interval; UL, upper limit of 95% confidence interval

**Table S2** Sensitivity analysis for the secondary analysis

| Study out       | Mean difference | P value | LL   | UL    | I <sup>2</sup> |
|-----------------|-----------------|---------|------|-------|----------------|
| Eswaran (2017)  | 3.87            | 0.02    | 0.71 | 7.03  | 21%            |
| Harvie (2017)   | 5.09            | 0.02    | 0.90 | 9.28  | 58%            |
| Paduano (2019)  | 6.39            | 0.004   | 2.00 | 10.77 | 58%            |
| Pedersen (2014) | 5.08            | 0.02    | 0.85 | 9.30  | 58%            |
| Zahedi (2018)   | 6.99            | 0.001   | 3.39 | 10.58 | 18%            |

Abbreviations: LL, lower limit of 95% confidence interval; UL, upper limit of 95% confidence interval

**Table S3** Risk of bias table for included studies

| Name of first author (year) | Random sequence generation (selection bias) | Allocation concealment (selection bias) | Blinding of participants and personnel (performance bias) | Blinding of outcome assessment (detection bias) | Incomplete outcome data (attrition bias) | Selective reporting bias | Other bias |
|-----------------------------|---------------------------------------------|-----------------------------------------|-----------------------------------------------------------|-------------------------------------------------|------------------------------------------|--------------------------|------------|
| Bohn (2015)                 | Low risk                                    | Low risk                                | Unclear risk                                              | Unclear risk                                    | Low risk                                 | Low risk                 | Low risk   |
| Eswaran (2016)              | Low risk                                    | Unclear risk                            | Unclear risk                                              | Unclear risk                                    | Low risk                                 | Low risk                 | Low risk   |
| Halmos (2014)               | Low risk                                    | Unclear risk                            | Unclear risk                                              | Unclear risk                                    | Low risk                                 | Low risk                 | Low risk   |
| Harvie (2017)               | Low risk                                    | Unclear risk                            | High risk                                                 | High risk                                       | Low risk                                 | Low risk                 | Low risk   |
| McIntosh (2017)             | Low risk                                    | Low risk                                | Unclear risk                                              | Unclear risk                                    | Low risk                                 | Low risk                 | Low risk   |
| Ong (2010)                  | Low risk                                    | Unclear risk                            | Unclear risk                                              | Unclear risk                                    | Low risk                                 | Low risk                 | Low risk   |
| Paduano (2019)              | High risk                                   | High risk                               | High risk                                                 | High risk                                       | High risk                                | High risk                | Low risk   |
| Patcharatrakul (2019)       | Unclear risk                                | Unclear risk                            | Unclear risk                                              | Unclear risk                                    | Low risk                                 | Low risk                 | Low risk   |
| Pedersen (2014)             | Low risk                                    | Unclear risk                            | High risk                                                 | High risk                                       | Low risk                                 | Low risk                 | Low risk   |
| Staudacher (2012)           | Low risk                                    | Low risk                                | Unclear risk                                              | Unclear risk                                    | Low risk                                 | Low risk                 | Low risk   |
| Staudacher (2017)           | Low risk                                    | Low risk                                | Unclear risk                                              | Unclear risk                                    | Low risk                                 | Low risk                 | Low risk   |
| Zahedi (2018)               | Low risk                                    | Unclear risk                            | Unclear risk                                              | Unclear risk                                    | Low risk                                 | Low risk                 | Low risk   |

Supplementary data

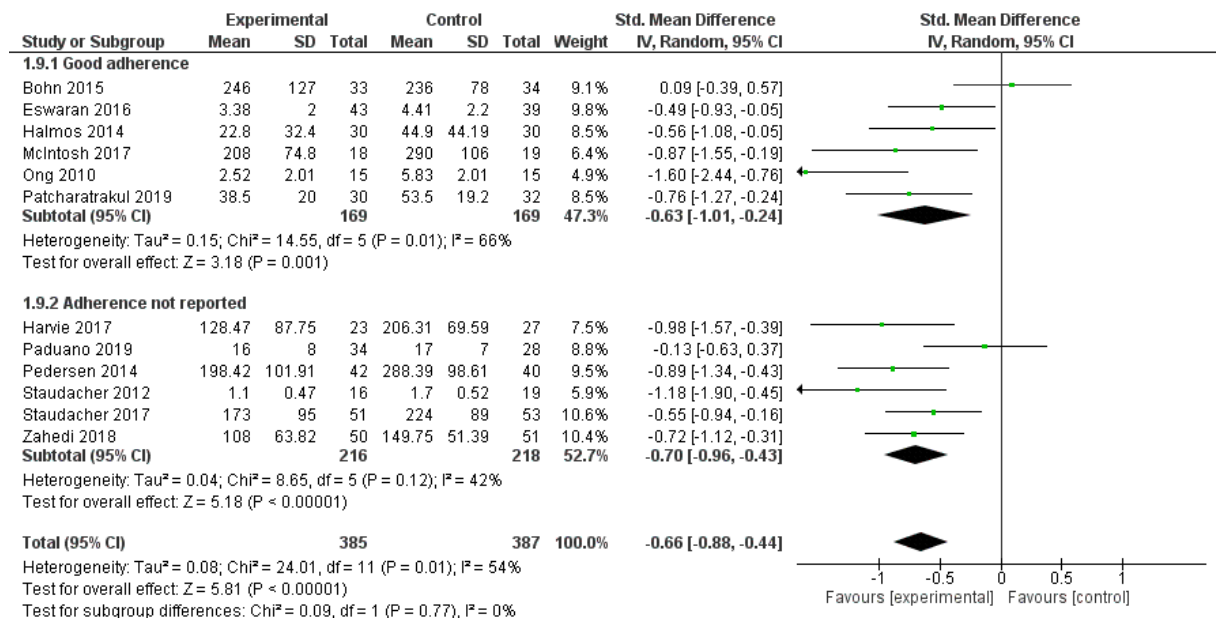

Fig. S1 Forest plot for subgroup analysis on adherence

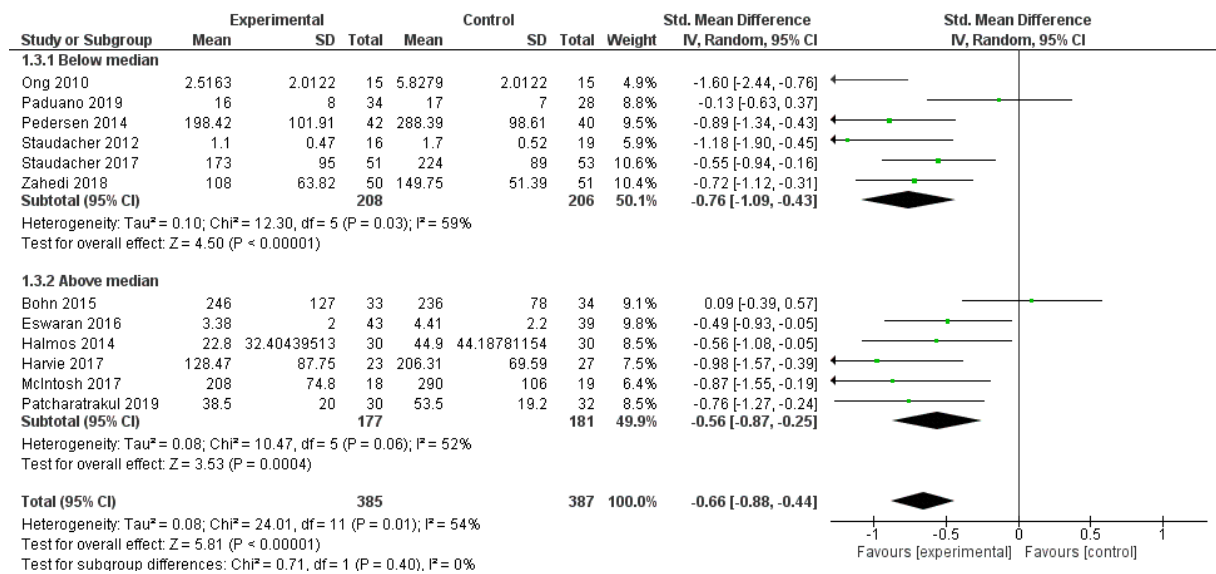

Fig. S2 Forest plot for subgroup analysis on age

Supplementary data

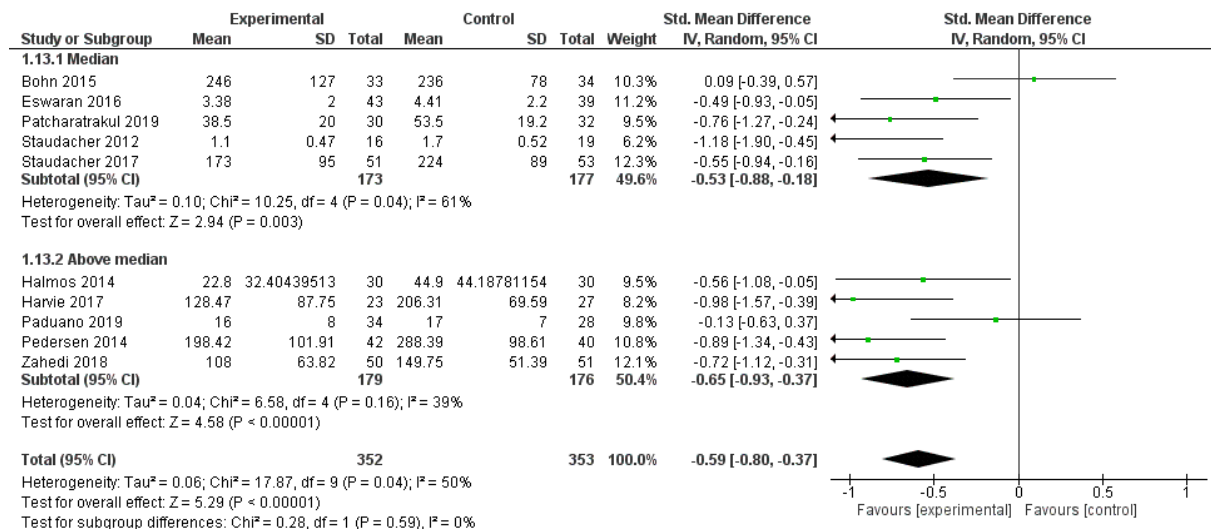

Fig. S3 Forest plot for subgroup analysis on duration

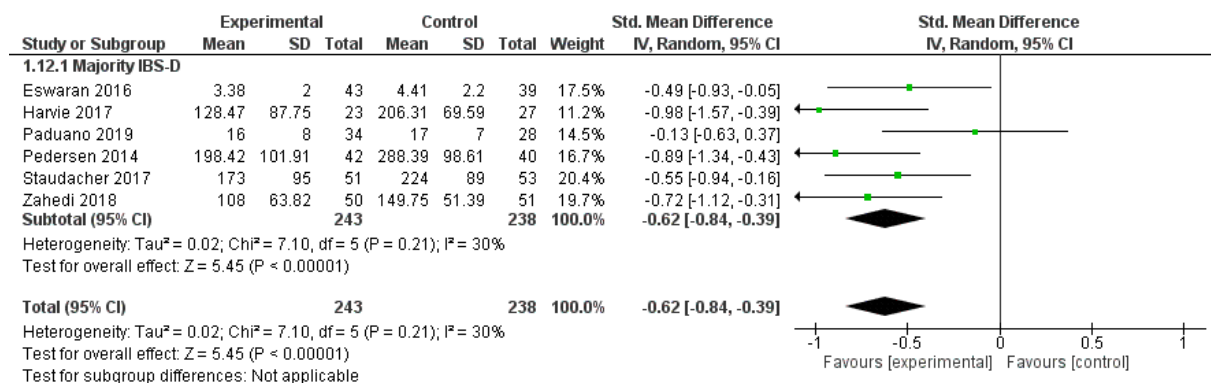

Fig. S4 Forest plot for subgroup analysis on IBS subtype

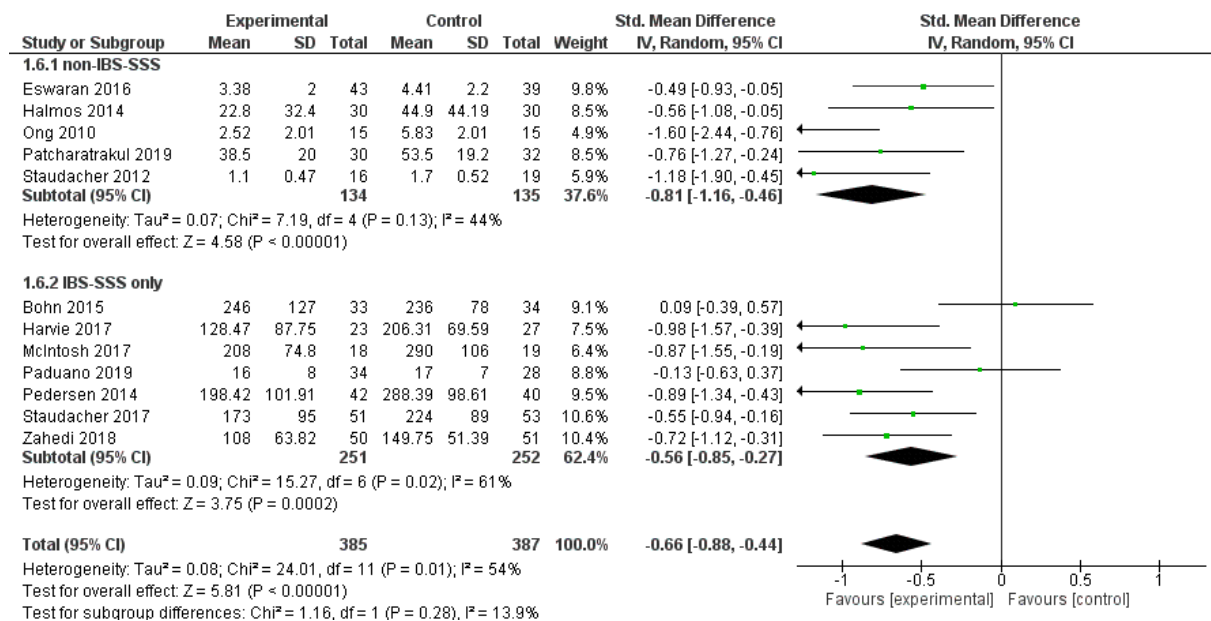

Fig. S5 Forest plot for subgroup analysis on outcome measure

Supplementary data

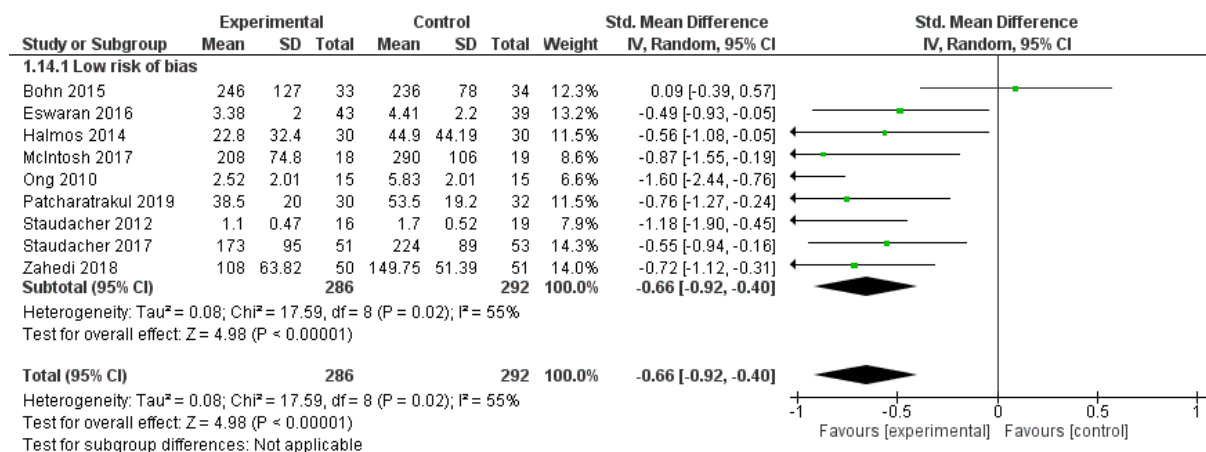

Fig. S6 Forest plot for subgroup analysis on risk of bias

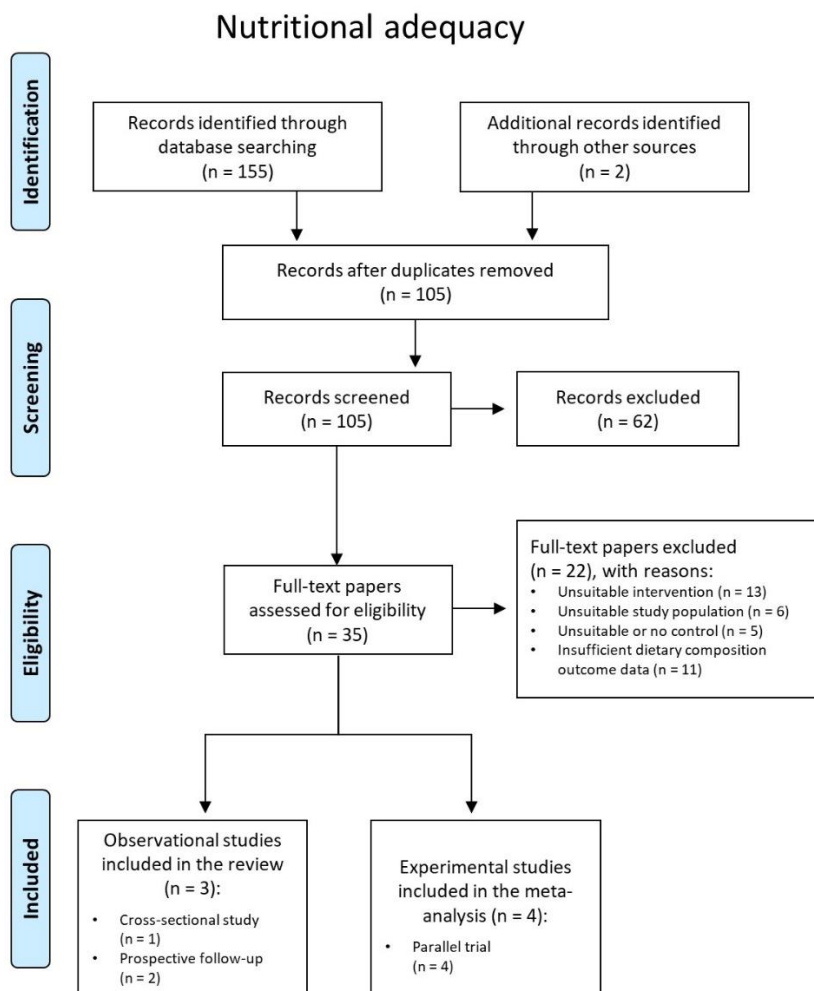

Fig. S7 Preferred Reporting Items for Systematic Reviews and Meta-Analyses (PRISMA) flow diagram of the study selection procedure for the analysis on nutritional adequacy effects

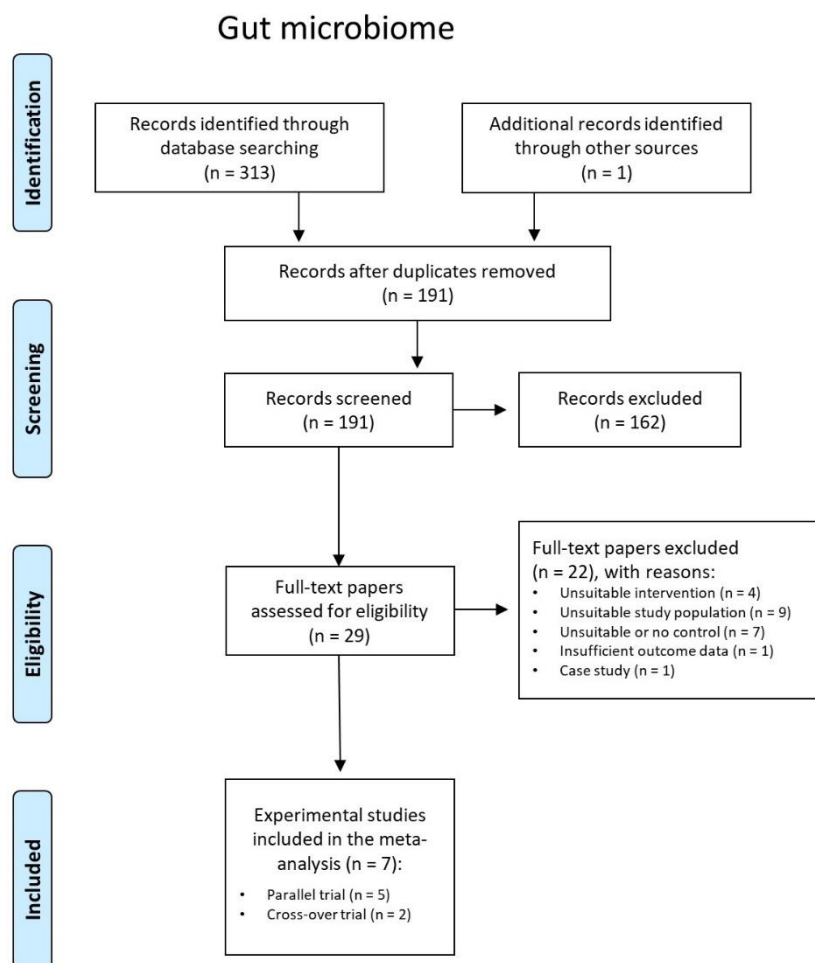

**Fig. S8** Preferred Reporting Items for Systematic Reviews and Meta-Analyses (PRISMA) flow diagram of the study selection procedure for the analysis on gut microbiome effects

### PubMed search syntaxes

(FODMAP OR FODMAPS OR saccharides OR oligosaccharide OR disaccharide or monosaccharide OR polyol OR polyols OR galacto-oligosaccharides OR fructans OR fructose OR galactans OR lactose OR sorbitol OR mannitol OR xylitol OR maltitol OR sweetener OR sweeteners OR sweetening agent) AND (IBS OR irritable bowel syndrome OR irritable colon)

(FODMAP OR FODMAPS OR "Fermentable Oligo-, Di-, Mono-saccharides And Polyols" OR "low FODMAP diet") AND (microbiota OR microbiome OR "gut microbiota" OR "gut microbiome" OR "gut flora")

(FODMAP OR FODMAPS OR "Fermentable Oligo-, Di-, Mono-saccharides And Polyols" OR "low FODMAP diet") AND (nutrient\* OR "nutritional profile" OR "nutrient content" OR "nutrient composition" OR "nutritional content" OR "nutritional composition" OR "nutritional adequacy")
